# Supplementary material for: Selective Degradation Permits a Feedback Loop Controlling Annexin A6 and Cholesterol Levels in Endolysosomes of NPC1 Mutant Cells
Source: MDPI journal article supplement (doi:10.3390/cells9051152), 2020-05-07
Supplement: s1 [file s1]

Supplementary materials

## Selective degradation permits a feedback loop controlling Annexin A6 and cholesterol levels in endolysosomes of NPC1 mutant cells

Elsa Meneses-Salas, Ana García-Melero, Patricia Blanco-Muñoz, Jaimy Jose, Marie-Sophie Brenner, Albert Lu, Francesc Tebar, Thomas Grewal, Carles Rentero and Carlos Enrich

### Supplementary Materials

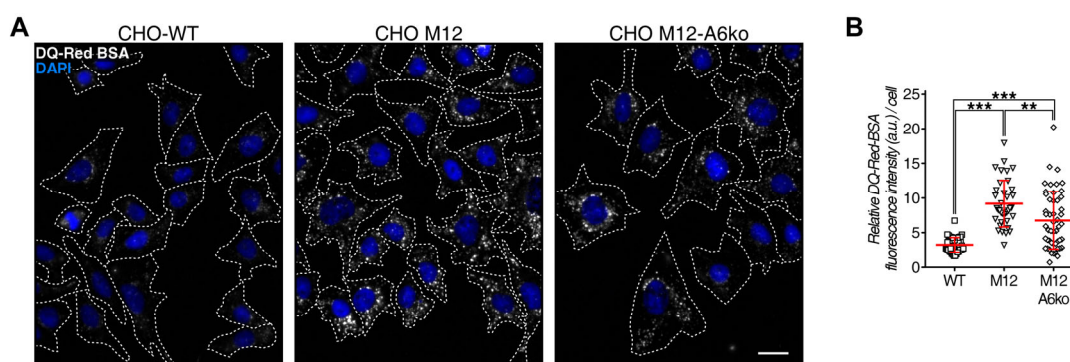

**Figure S1.** AnxA6 depletion normalizes increased capacity for bulk lysosomal degradation in NPC1 mutant cells. (A) CHO-WT, CHO M12, and CHO M12-A6ko cells were incubated with 10  $\mu\text{g/ml}$  DQ-Red-BSA (gray) for 6 h at 37°C. Cells were fixed, nuclei were stained with DAPI (blue), and cells were visualized in a confocal microscope. Merged images are representative for three independent experiments. For better comparison of DQ-Red-BSA staining, the outline and shape of cells is indicated. Scale bar is 20  $\mu\text{m}$ . (B) Quantification of the bright red (pseudocolored grey) fluorescent signal (Total cell fluorescence; arbitrary units, a.u.) derived from internalized and cleaved DQ-Red-BSA in late endosomes/lysosomes served as a measure for bulk lysosomal degradation (see Material and Methods for further details) [41]. More than 50 cells per cell line in three separate experiments were analyzed. The data is shown as dot plot. The mean  $\pm$  SEM is also given (\*\* $p < 0.01$ , \*\*\* $p < 0.001$ ).

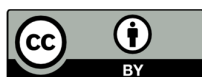

© 2020 by the authors. Submitted for possible open access publication under the terms and conditions of the Creative Commons Attribution (CC BY) license (<http://creativecommons.org/licenses/by/4.0/>).
